# Supplementary material
Source: publisher figshare collection journal article supplement (https://geolsoc.figshare.com/articles/dataset/_/3454496)

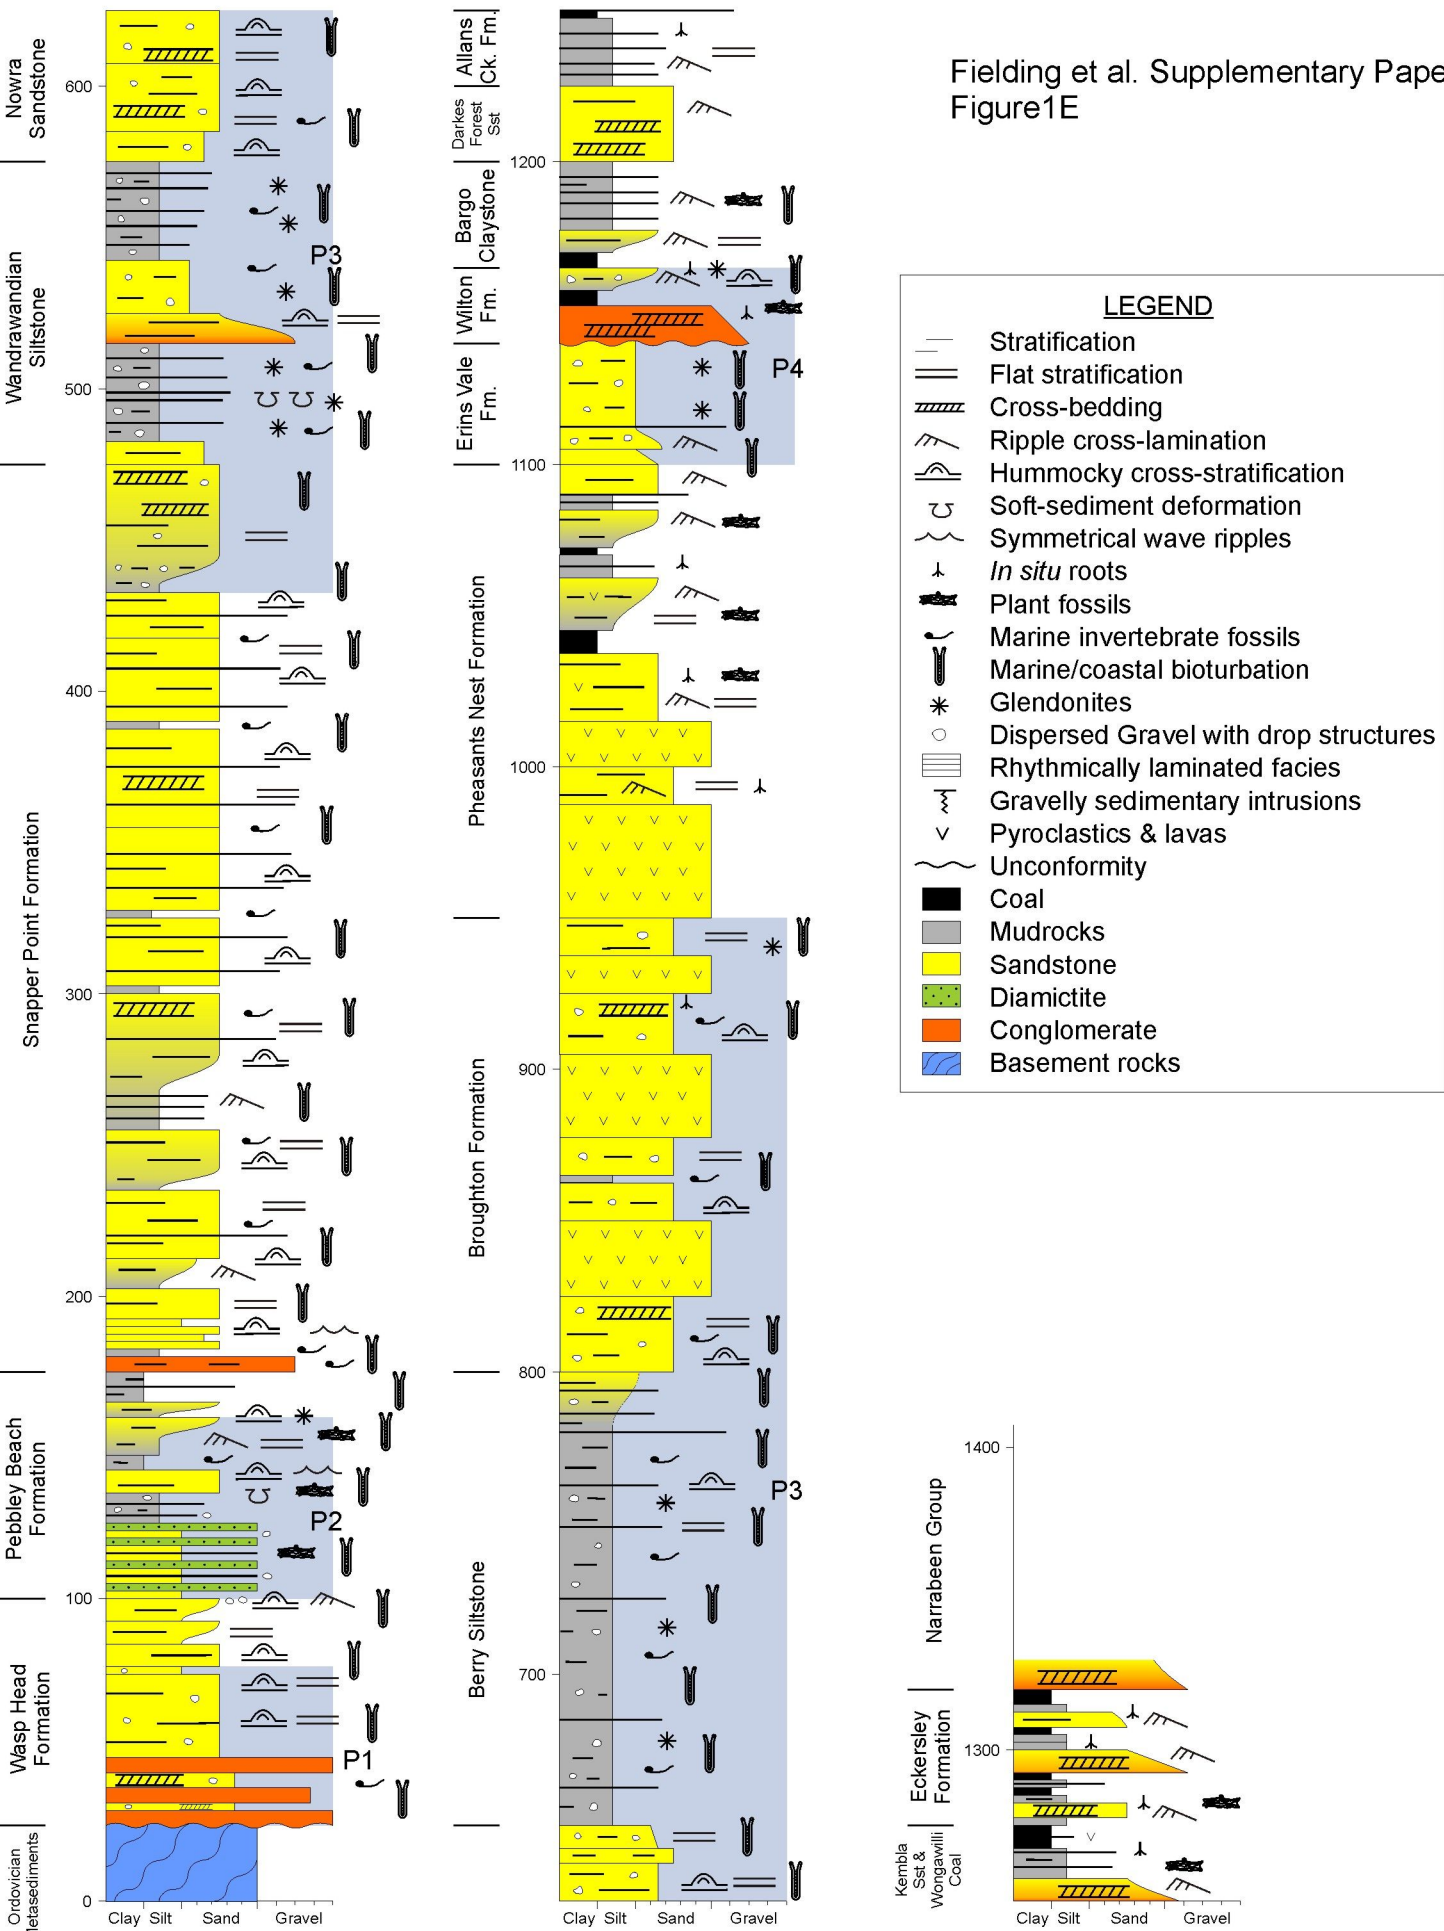

**LEGEND**

- Stratification
- == Flat stratification
- /// Cross-bedding
- ~> Ripple cross-lamination
- ~> Hummocky cross-stratification
- ~> Soft-sediment deformation
- ~> Symmetrical wave ripples
- ~> *In situ* roots
- ~> Plant fossils
- ~> Marine invertebrate fossils
- ~> Marine/coastal bioturbation
- \* Glendonites
- Dispersed Gravel with drop structures
- ||| Rhythmically laminated facies
- ~> Gravelly sedimentary intrusions
- ~> Pyroclastics & lavas
- ~> Unconformity
- Coal
- Mudrocks
- Sandstone
- Diamicrite
- Conglomerate
- Basement rocks

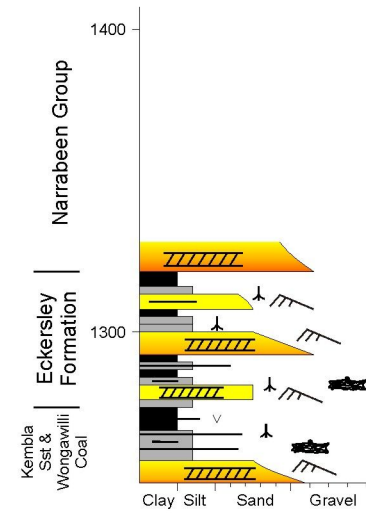

Supplement: Supplementary file 1 [file 1]
