# Supplementary material
Source: publisher figshare collection journal article supplement (https://geolsoc.figshare.com/articles/dataset/_/3454496)

# ROCKY CREEK SYNCLINE/ GUNNEDAH BASIN

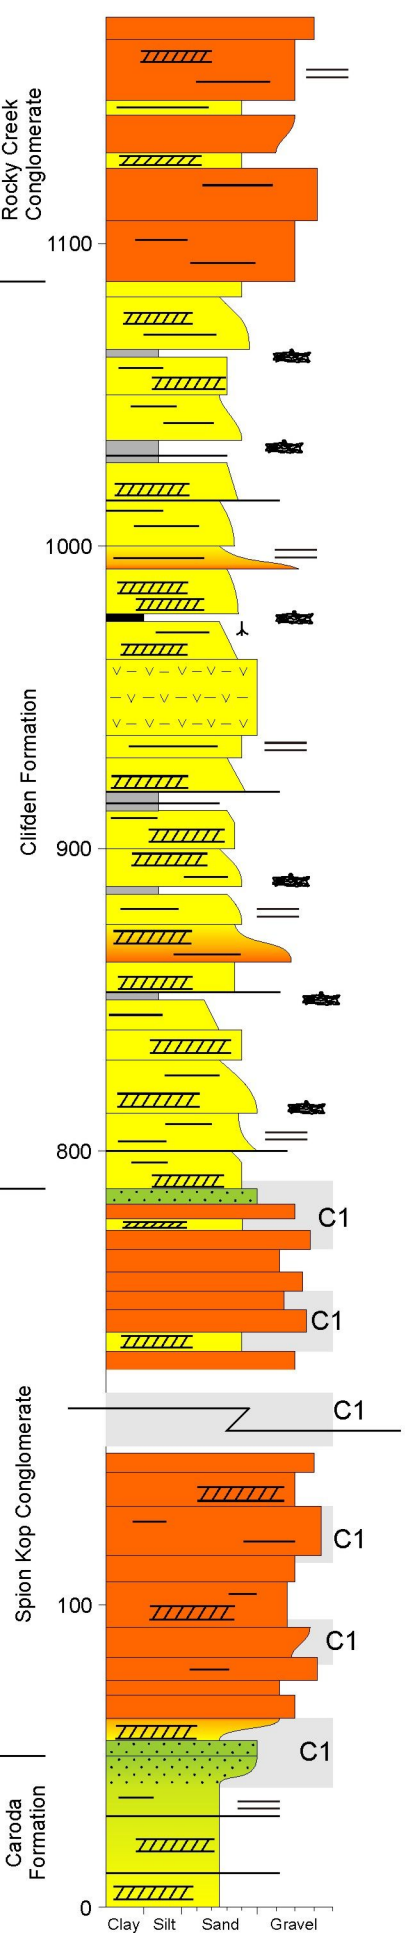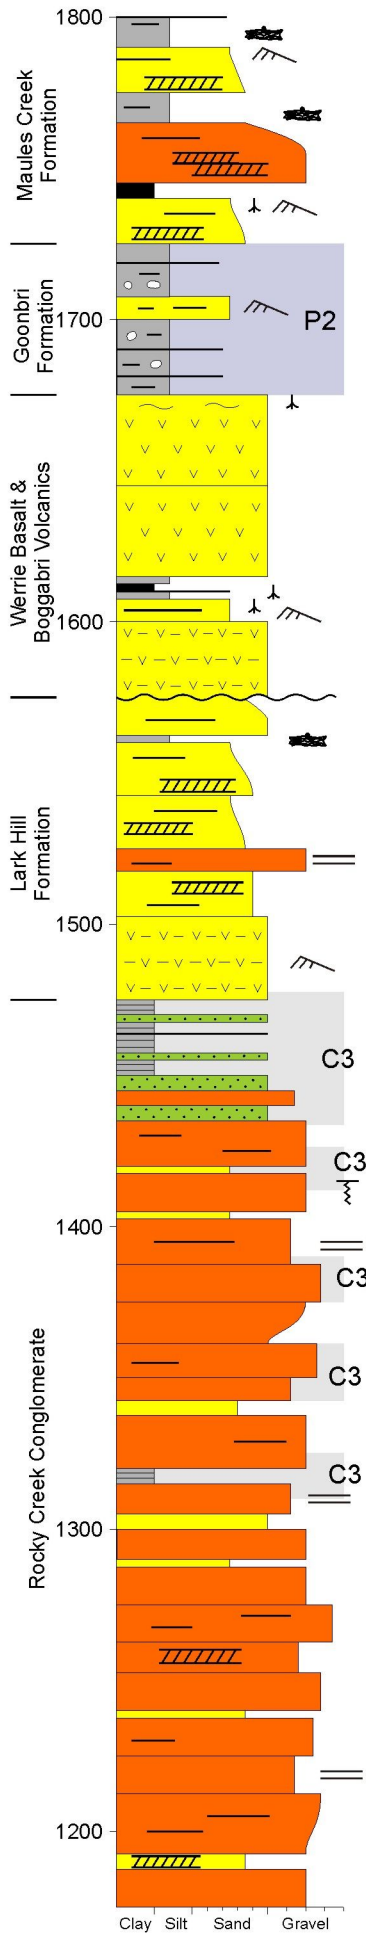

Fielding et al. Supplementary Paper  
Figure 1C

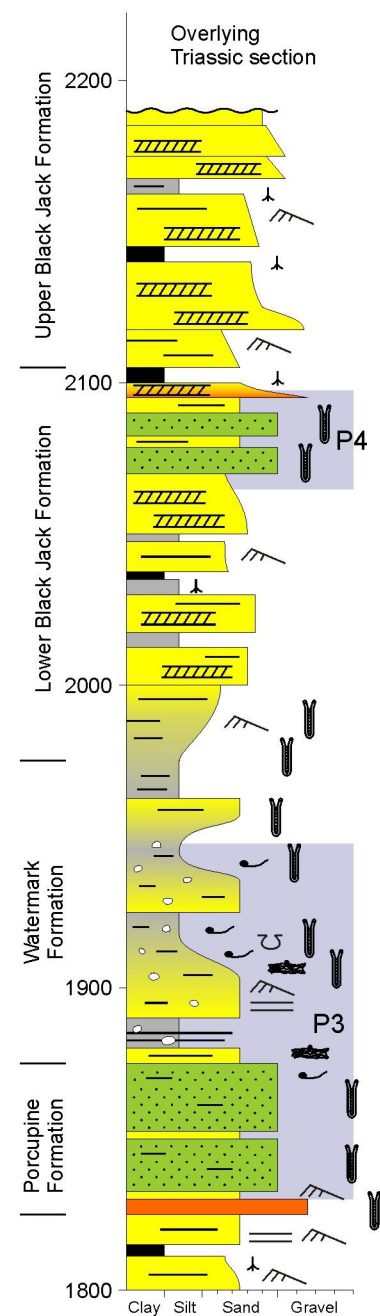

Supplement: Supplementary file 2 [file 1]

# DENISON TROUGH (WESTERN BOWEN BASIN)

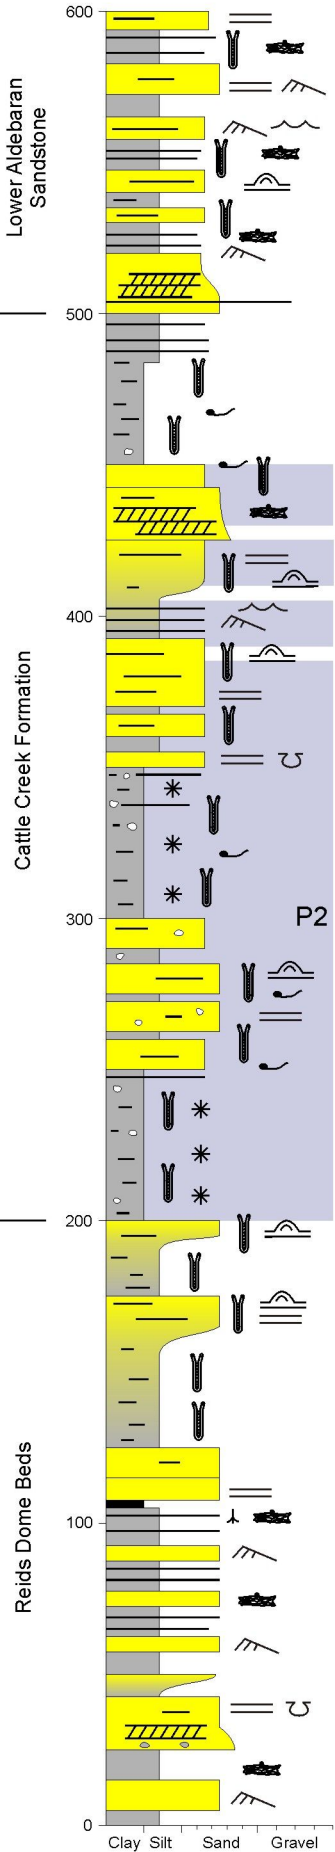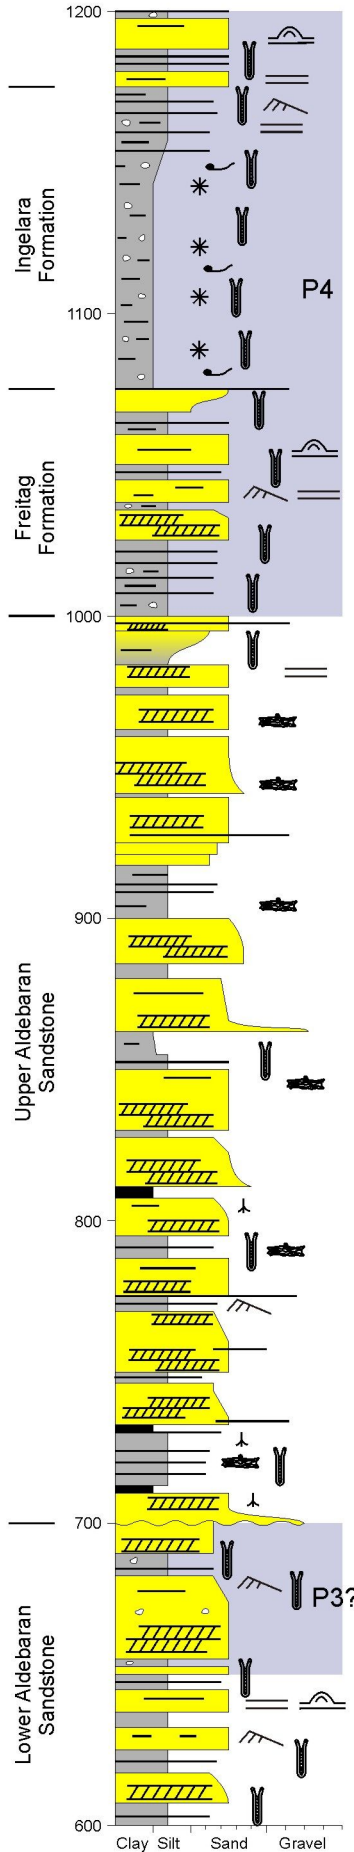

Fielding et al. Supplementary Paper  
Figure 1B

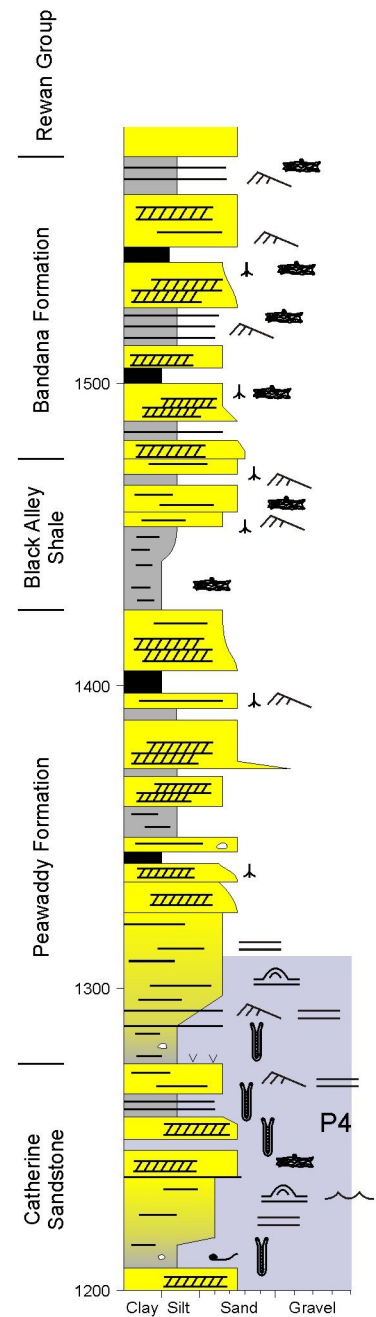

Supplement: Supplementary file 3 [file 1]

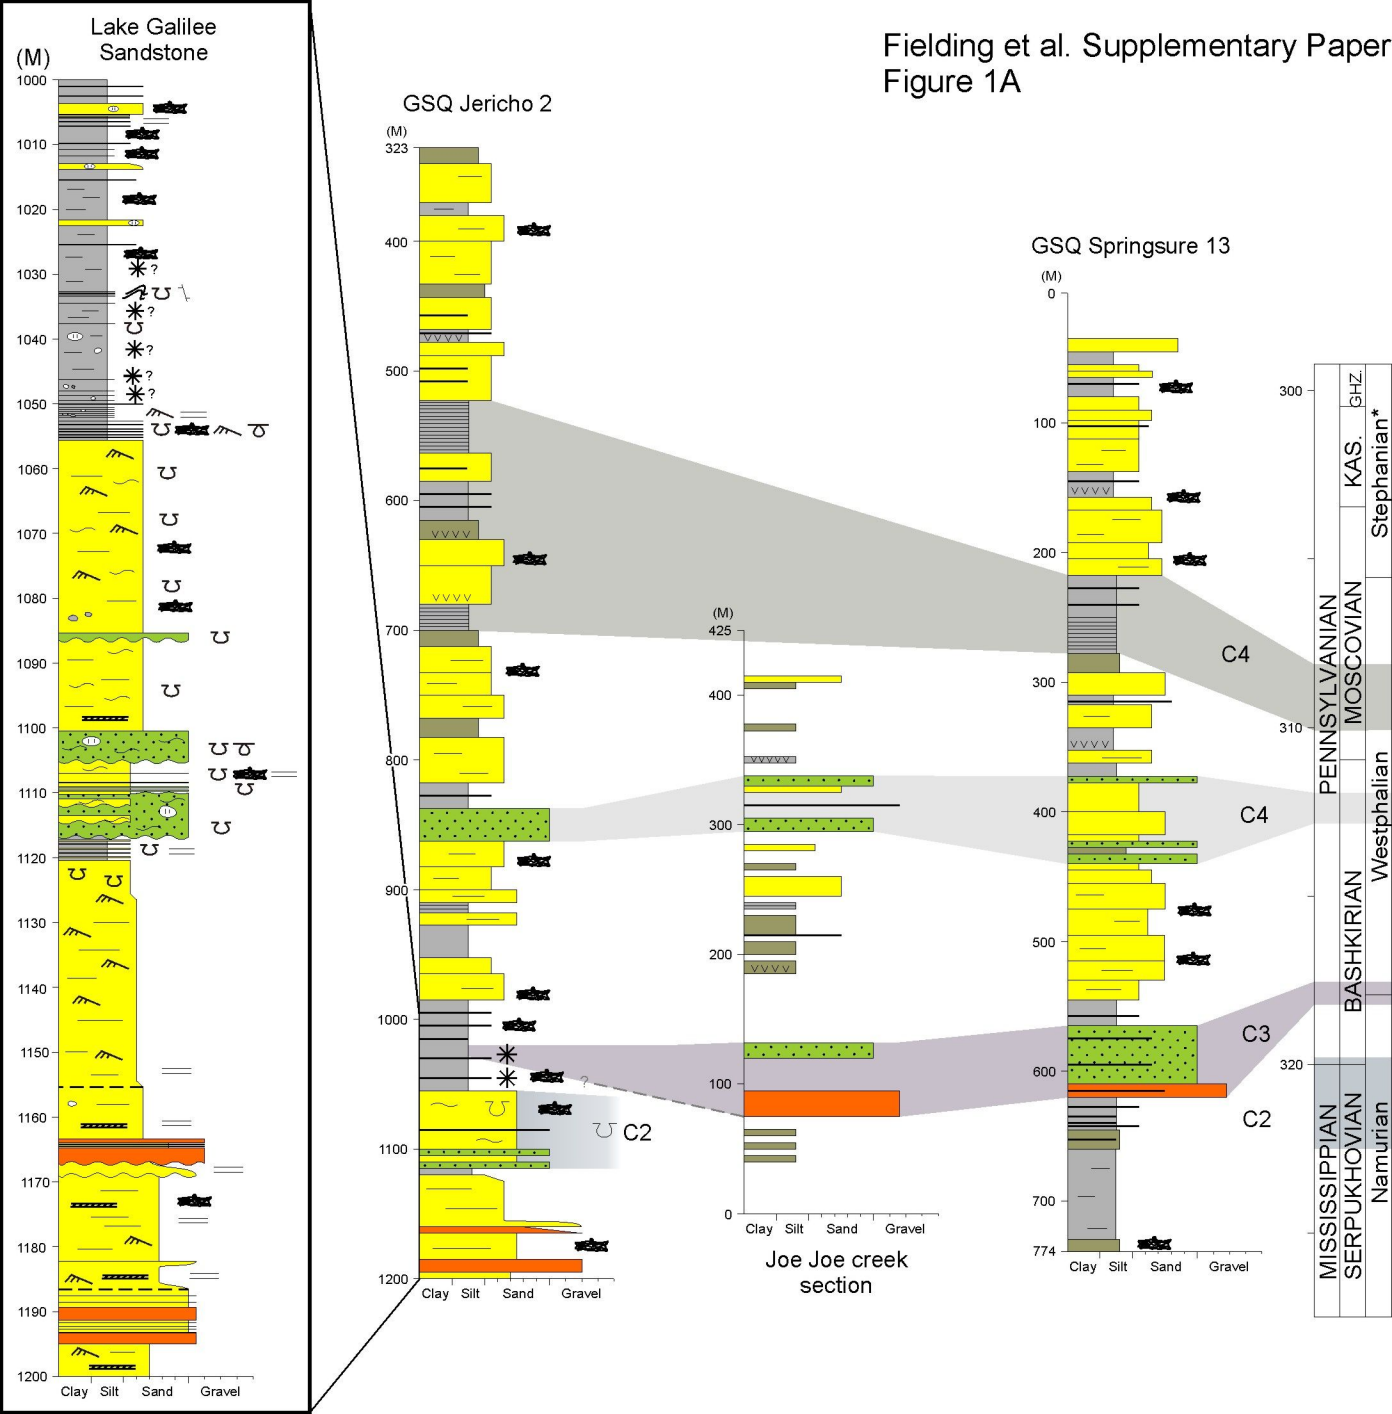

Supplement: Supplementary file 4 [file 1]

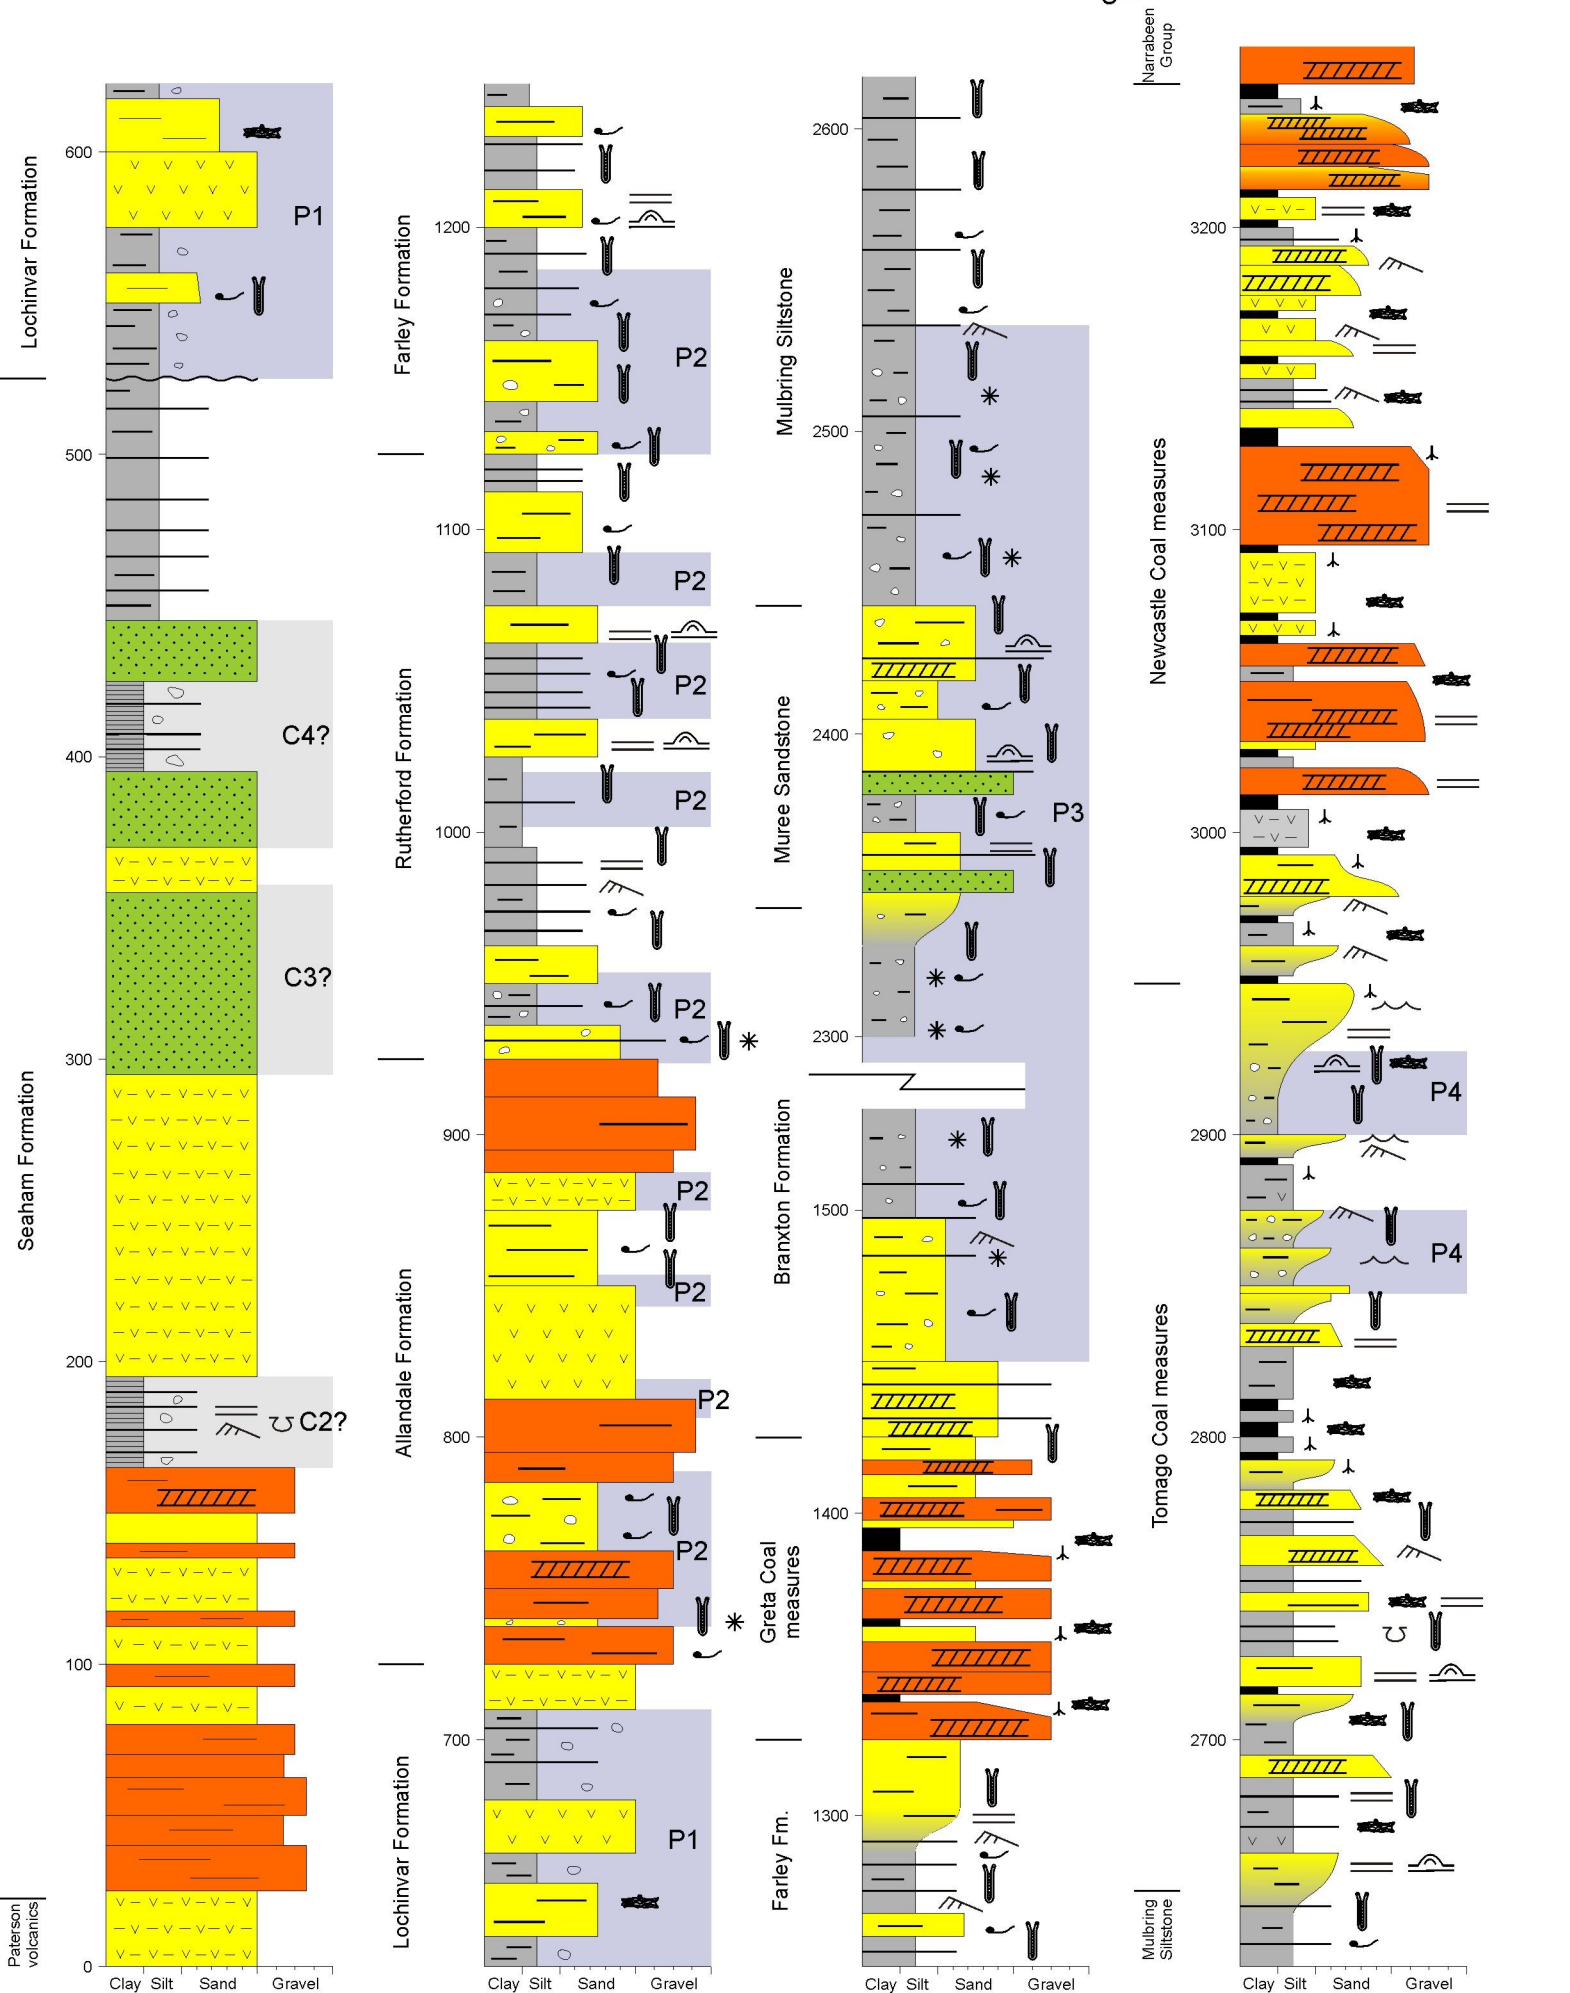

Supplement: Supplementary file 5 [file 1]
